# Supplementary material for: Divergent functions of two clades of flavodoxin in diatoms mitigate oxidative stress and iron limitation
Source: eLife journal article supplement (doi:10.7554/elife.84392), 2023-06-06

# A

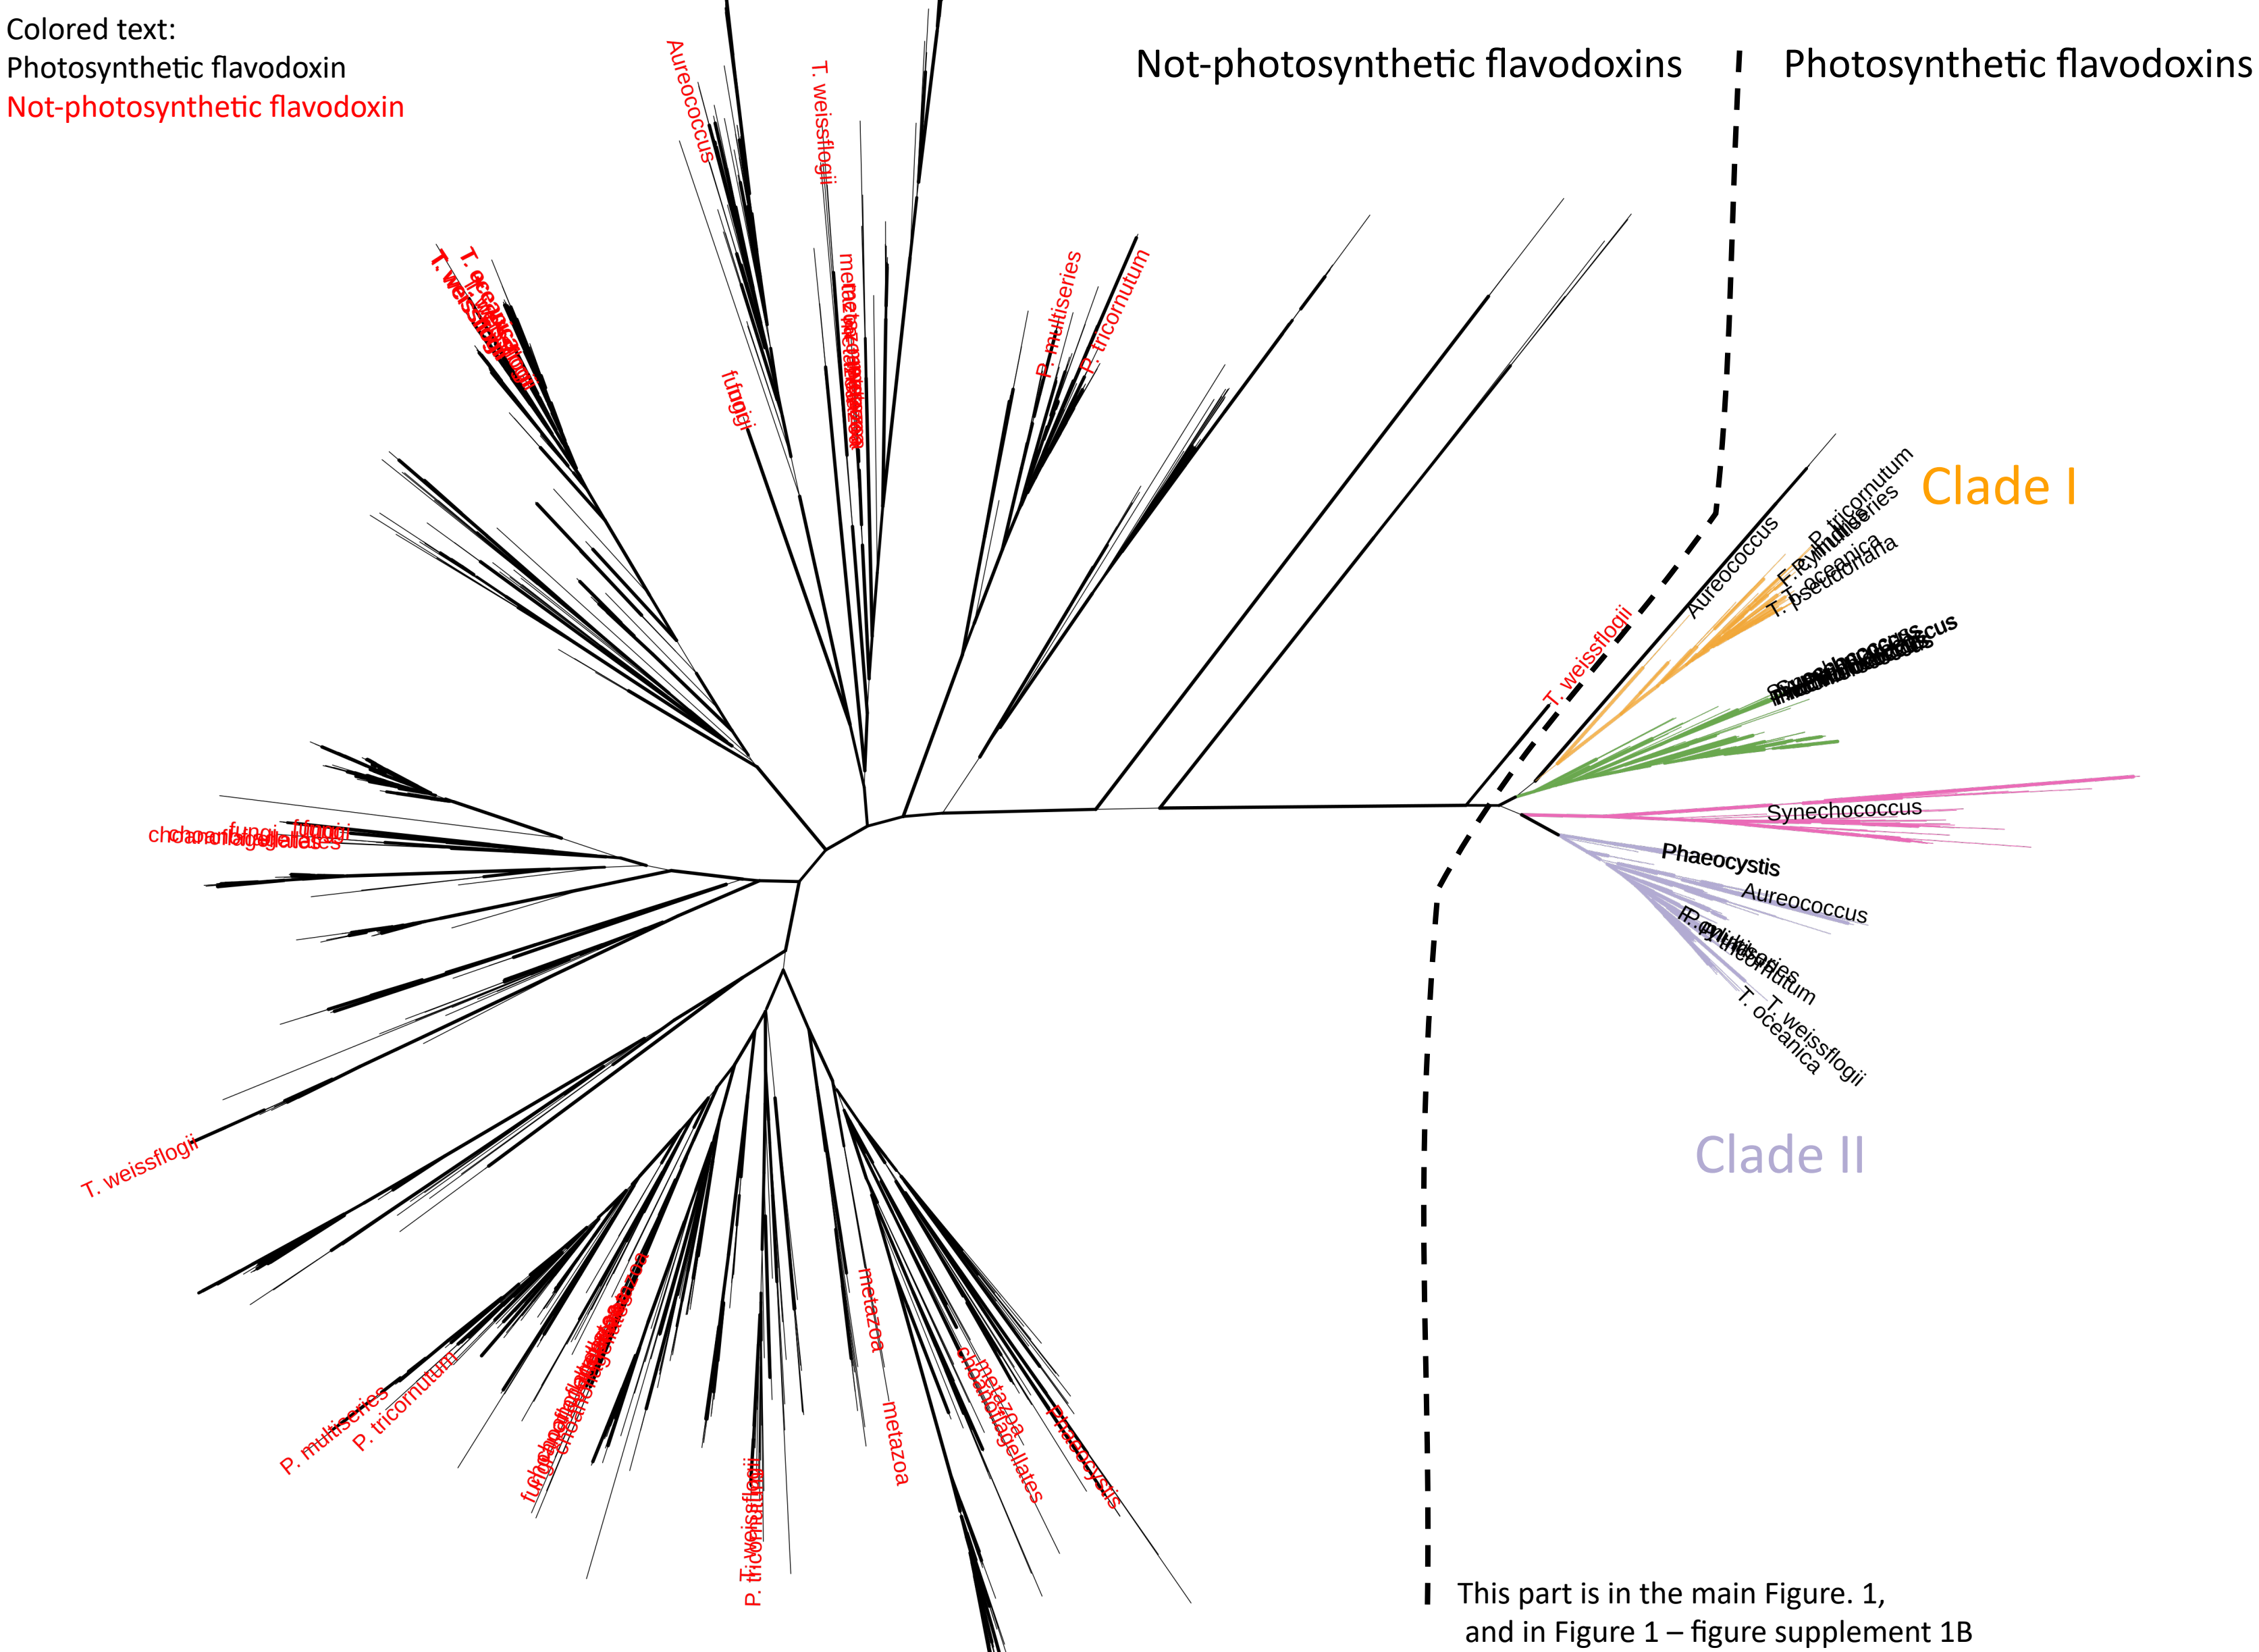

This part is in the main Figure. 1,  
and in Figure 1 – figure supplement 1B

# B

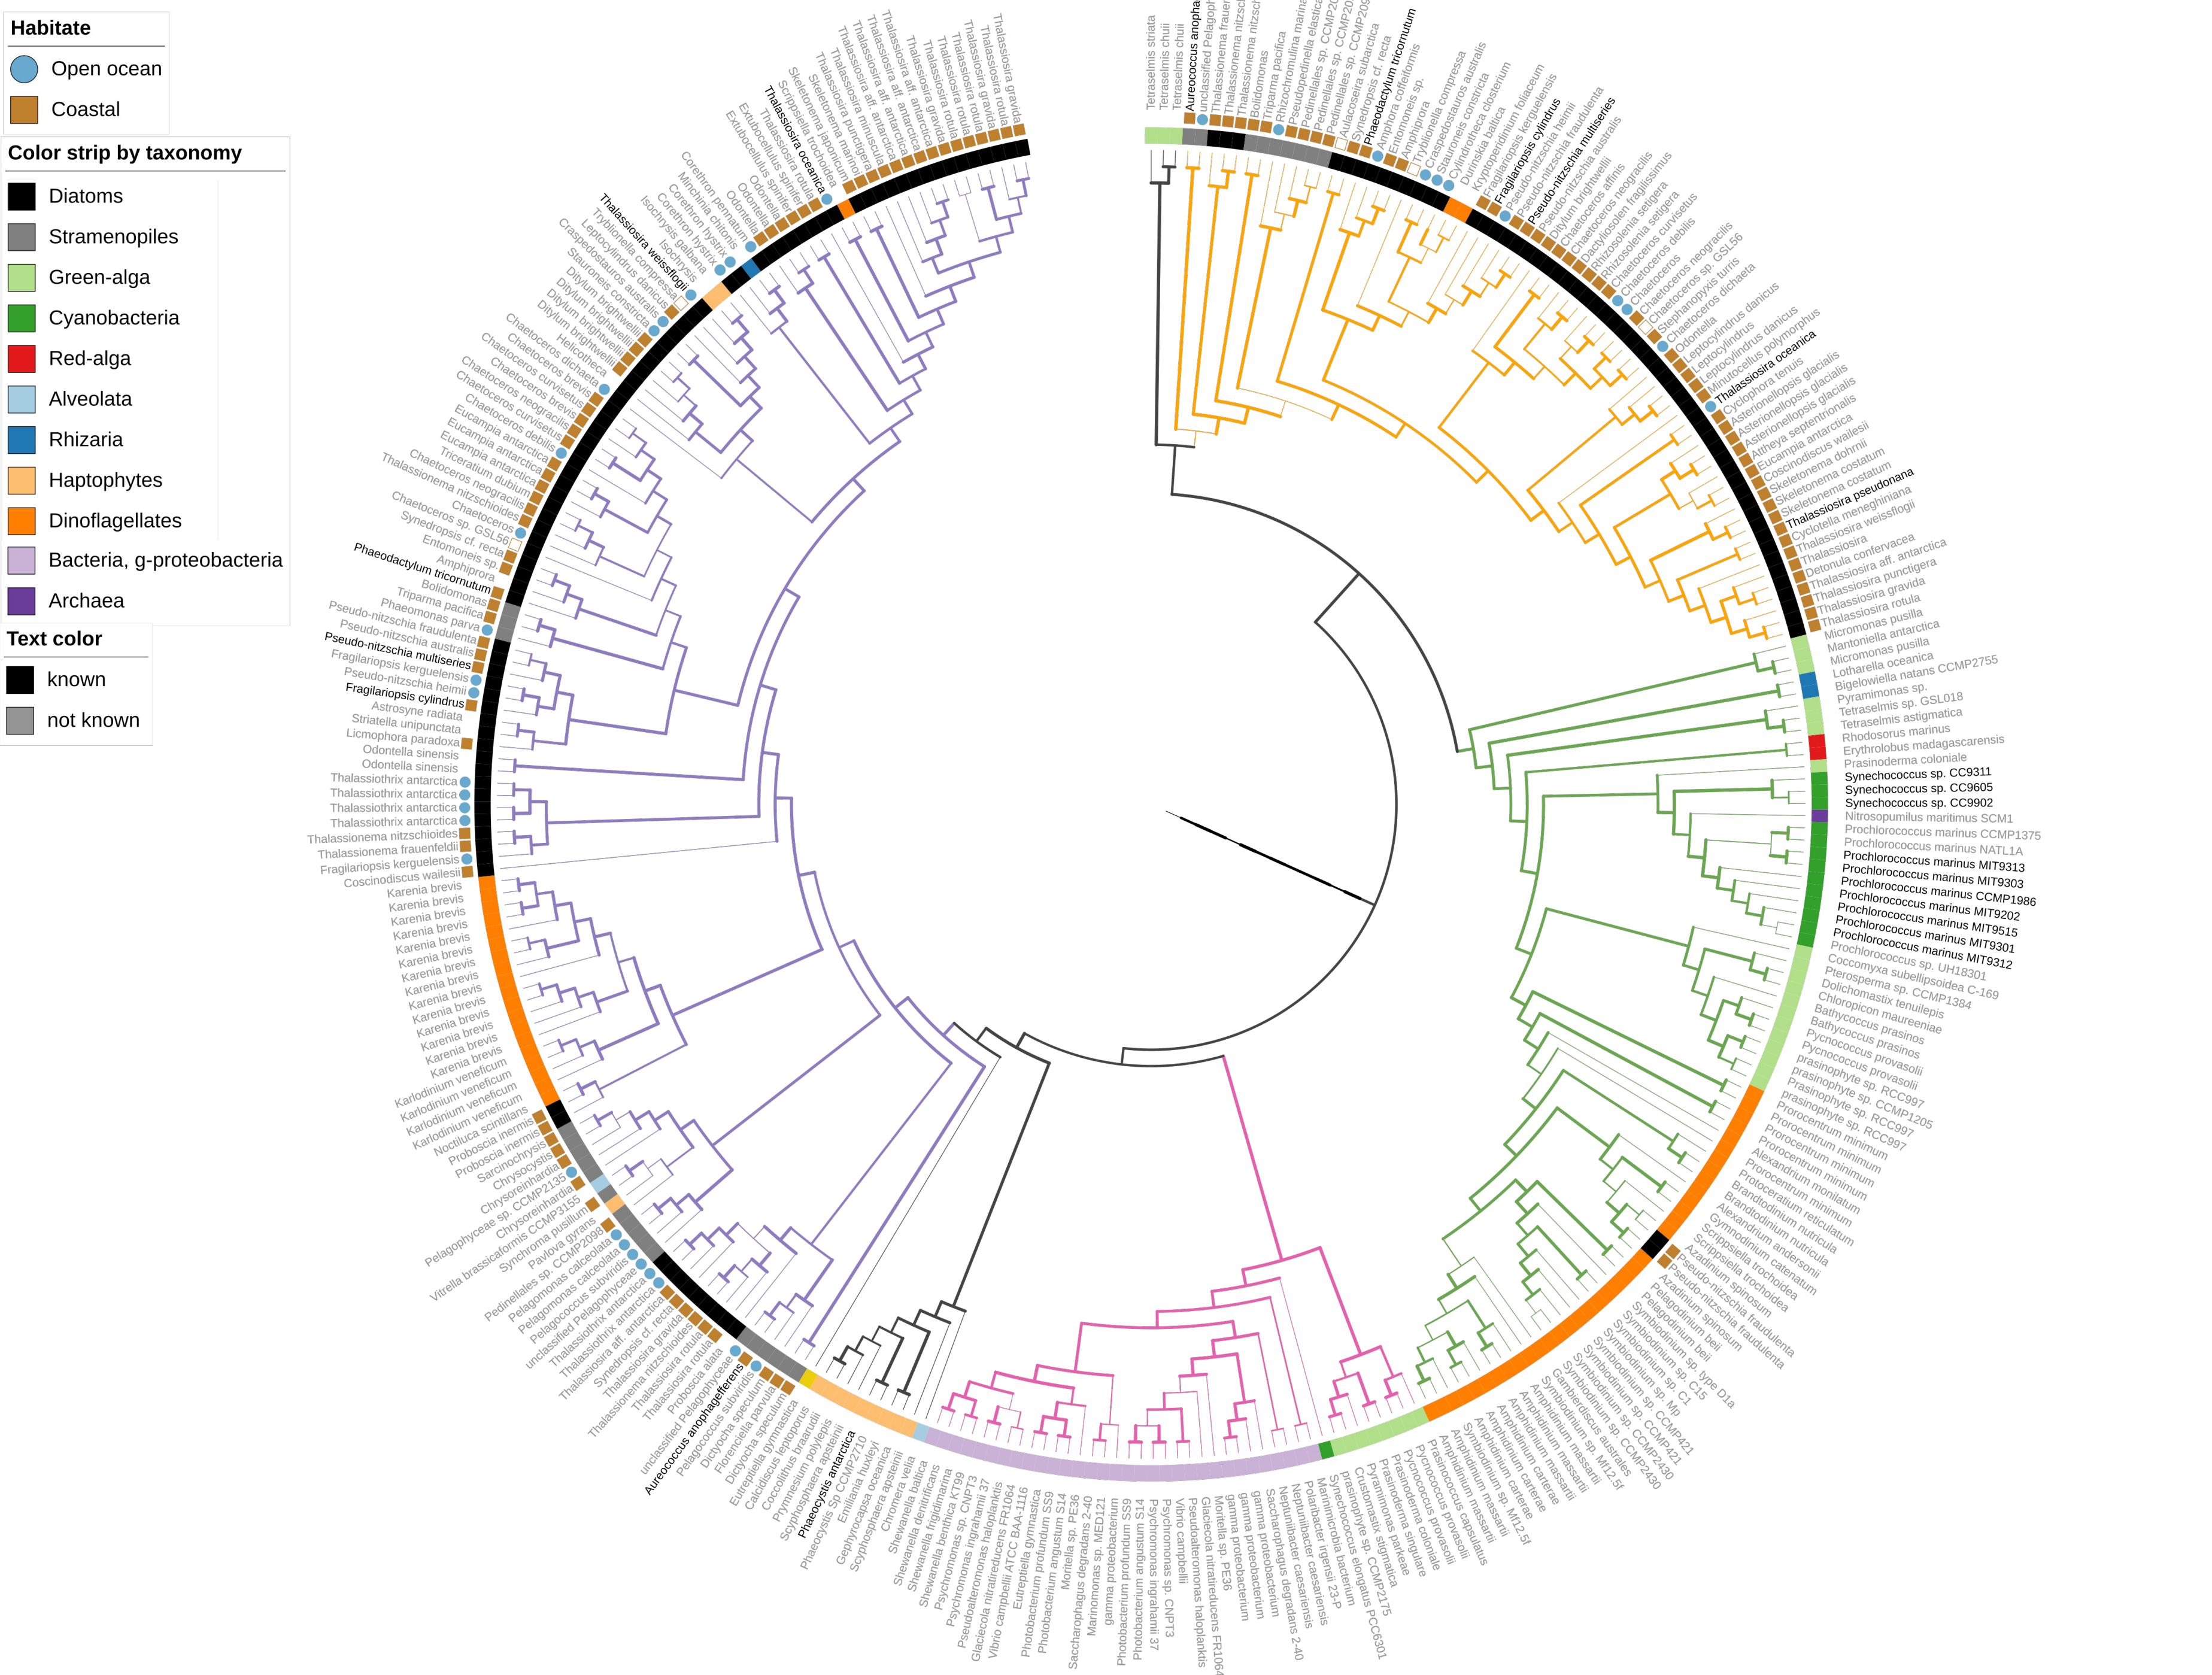

C

Symbol:

- ☆ Known induced under Fe limitation
- ★ Known **not** induced under Fe limitation

Text labels:  
Photosynthetic flavodoxin  
Not photosynthetic flavodoxin

Taxonomy colored strip:

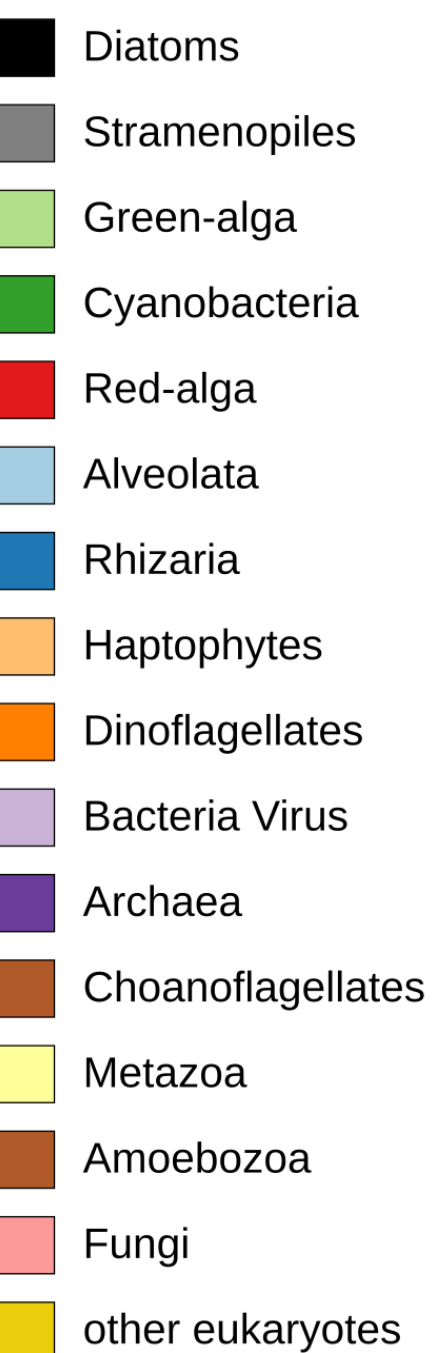

Branch color:  
Clade I  
Clade II  
Clade green  
Clade pink

Branch width represents bootstraps:

1      

0.7    

0.3    

2

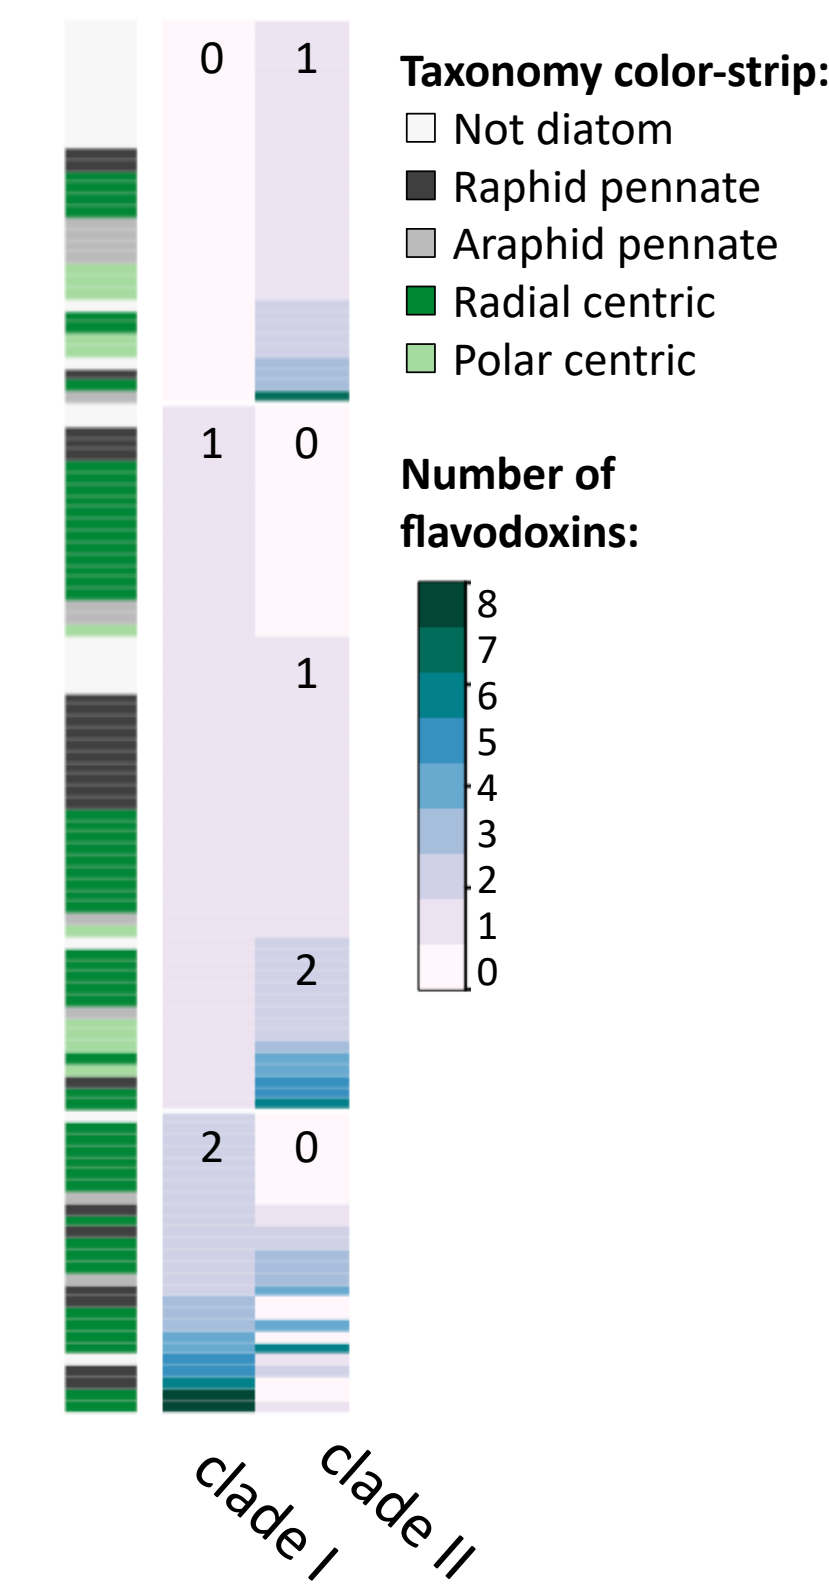

# E

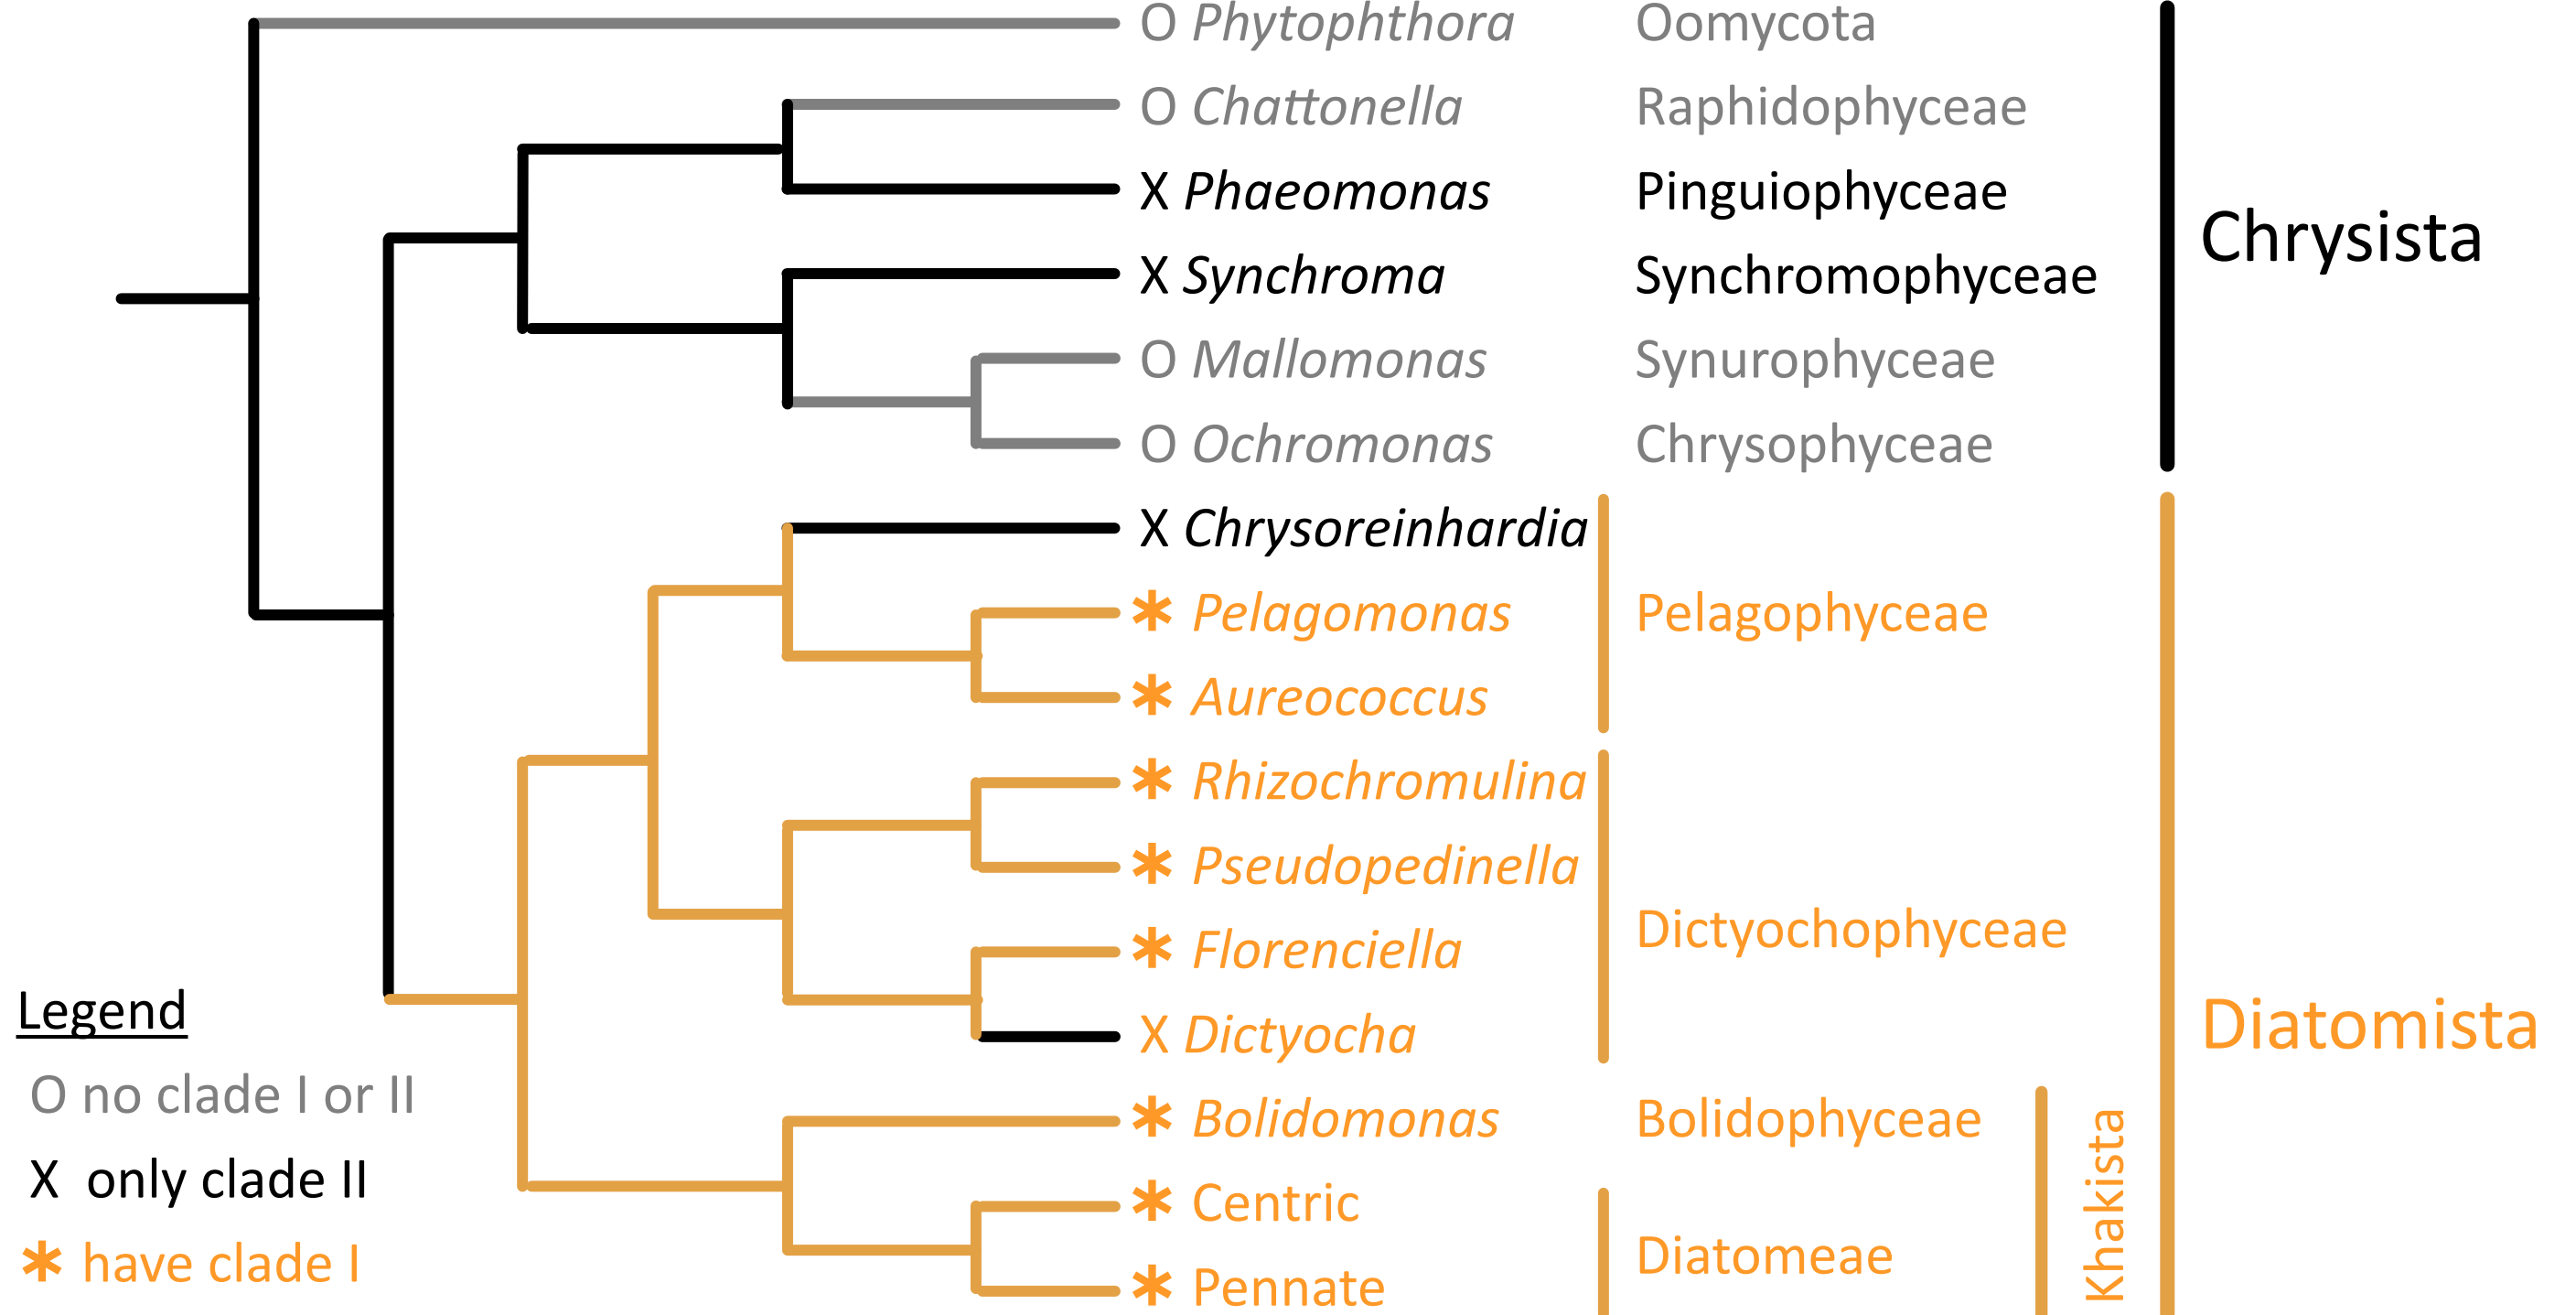

### Legend

0 no clade I or II

X only clade I

- \* have clade I

**F**

**F**

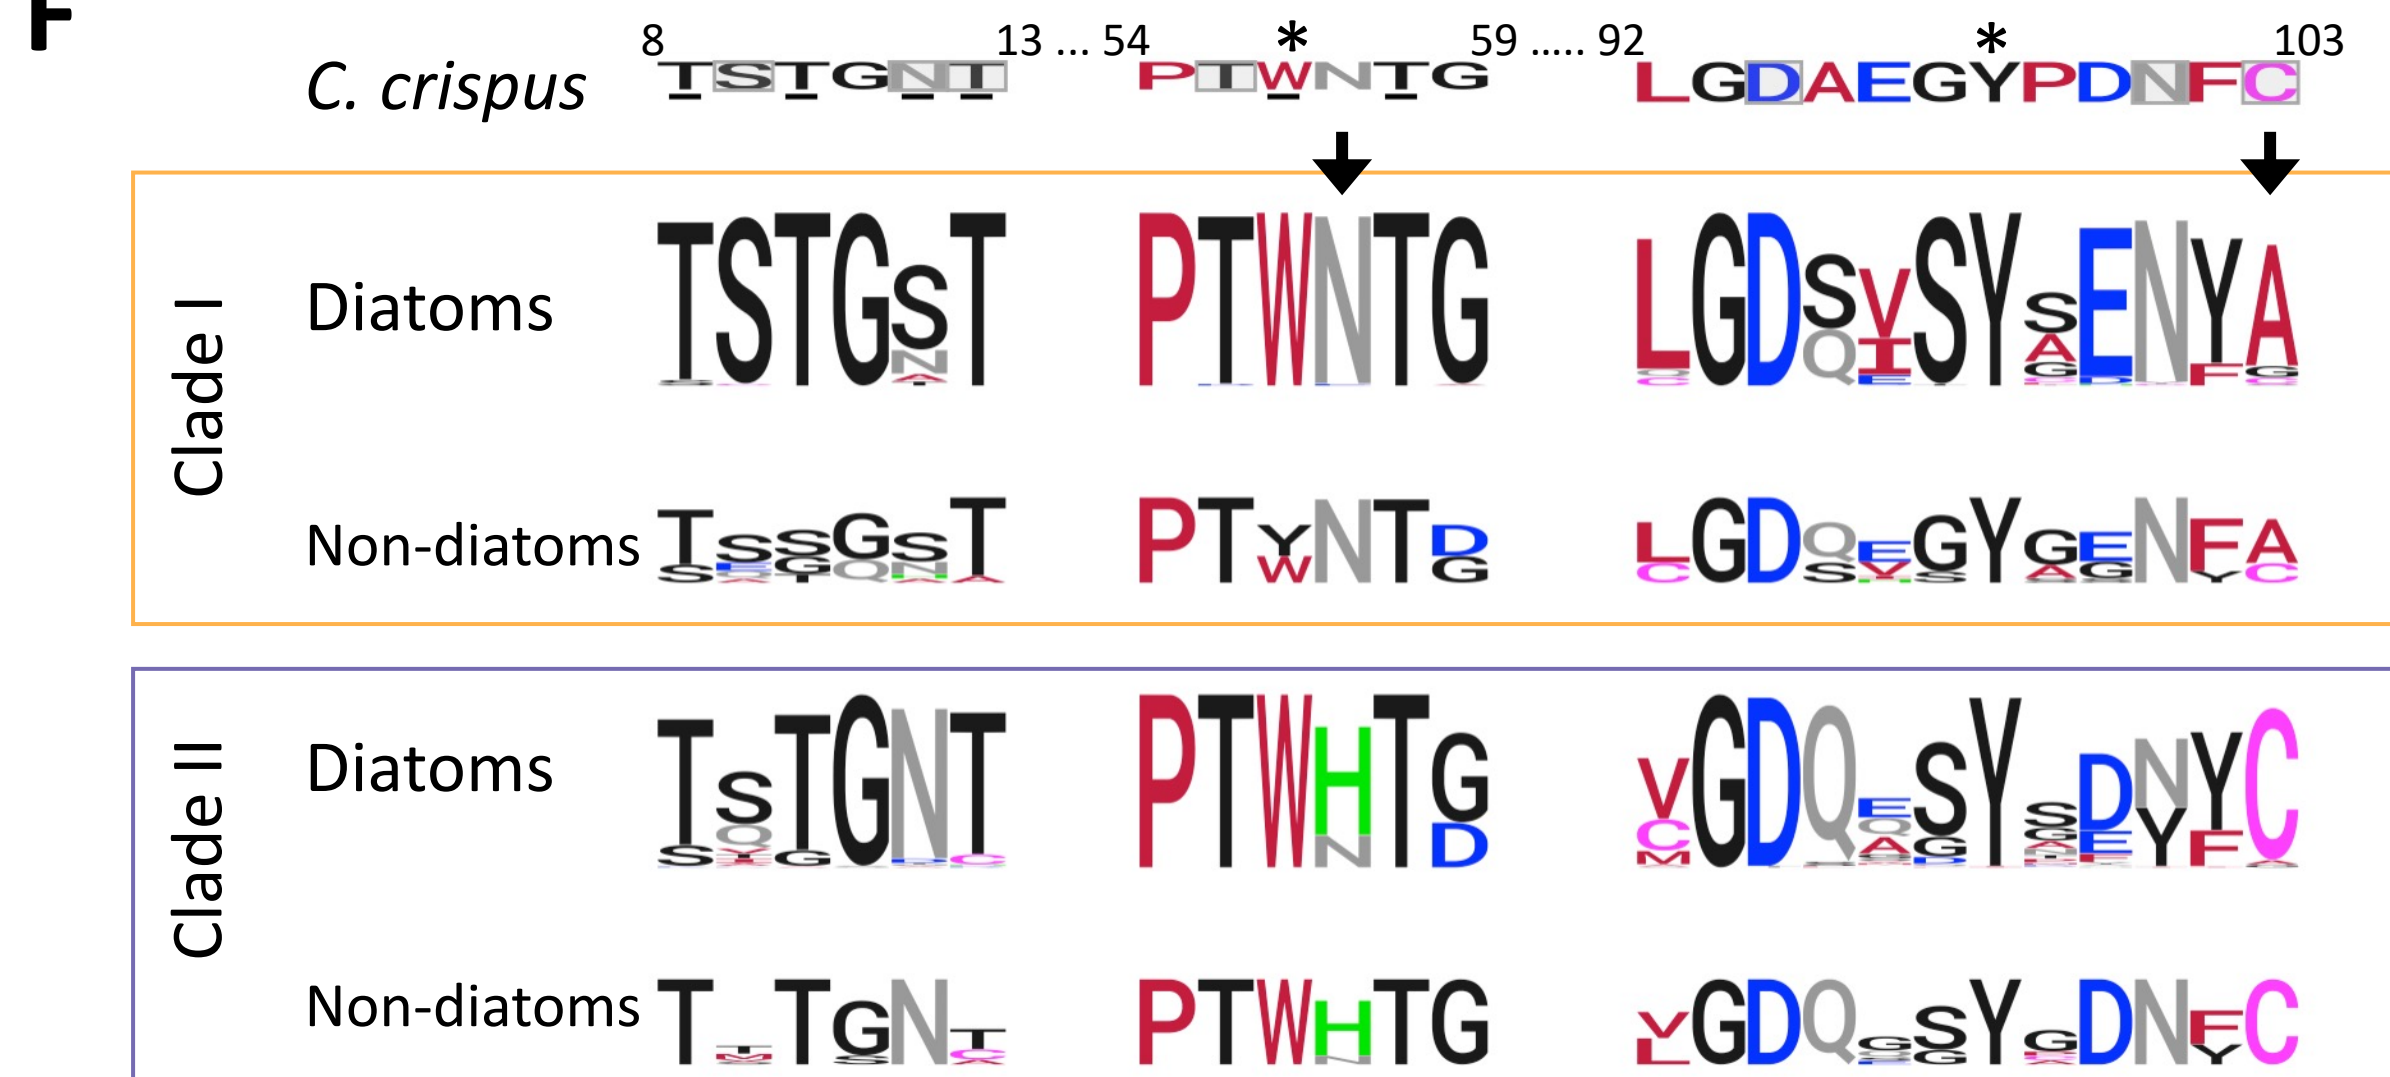

Supplement: supp [file elife-84392-supp-v1.zip]
