# Supplementary material for: Divergent functions of two clades of flavodoxin in diatoms mitigate oxidative stress and iron limitation
Source: eLife journal article supplement (doi:10.7554/elife.84392), 2023-06-06
Supplement: supp [file elife-84392-supp-v1.zip]

ATCGGGGAATAACGTTGGACCTTTTTGGGTTTCTGATACAAATATCTTTTCGATCCAACAGCCTCTTCGCCCCACCACACATTCTCCAGAAACATGAACAAGTGCATCTCCATCCTCCTCGCCACGGCAACCTCTACCTCTGCCTTCGTGACACATCAAGGTRTCGGTGGCAGATATGCAAGTCACCCCTACACGCCGAGAAGCAAGTGTATAGGCCCTTATTTGCAACCTGGAATAACCCAAAGACTATGTTTATAGAAAAGCTAGGTTGTCGGAGAAGCGGGTGTTGTGTAAAGAGTCTGTTGACTTGTTACAGTAGAGGTAGGAGGAGCGGTCGCCGTTGGAGATGGAGACGGAAGCAGTGTGTAGTTCCAYAGCCACCGTCTATACGTCAAGTGGGATGTGCGGCTCTTCGTTTCA

1 5 10 15 20 25 30 35  
M N K C I S I L L A T A T S T S A F V T H Q G X G R Y A V T L H A E K Q V

Exon1

GGCGTCTTCTTCGGTACTTCCACAGGAAGCACAGAGGAGGACGCCGAGCTCATCGTATCGGAATTCTGGTGATGTTGCAGCAGGACCTATTGATATTGATGGTGTAGCCGCGCAGTGTGCCAAAGAGTTTGCAGAAATGATGCTTTAGTGGTAAGATKTGTTTCATCGTCGTACATATCATAATGTGCCCTWGATCCTGTGCATCACATGCCGAGAAGAAGCCATGAAGGTGTCCTTCGTCTCCTCCGTCGGCTCGAGTAGCATAGCCTTAAGCCACTACAACGTCGTCTCGGATAACTATACTACCACATCGGCCGTCACAACGGTTTCTCAAACGCTTCATACTACGAAATCACCATTCTAMACAAGTAGCAGCATGTATAGTATTACACGGGAWCTAGGACAGCGTAGTGTAC

40 45 50 55 60 65 70 75 80 85  
G V F F G T S T G S T E E A A E L I V S E F G D V A A G P I D I D G V A G S V A K E F A K Y D A L V

Exon1

FMN bind

Targeted deletion

TGTCTGATGCCGTTCTCCGATATCTTCTCATTAAACAGTGAACACCAACACTGGAACACTGCTGACACTGAACGTAGTGGACGGGCTGGGATGAGATCTACTACTCTGAAATGCAAGATCTCGACATTGCAAGGGAAGAGTGGCCGTTTTCCGATTAGGAGATTCAGTTAGTTATTGTTGAGAAYATGCTGATGCGACTGCTG  
 TACACAGACTACGGCAAGAGGCTATAGAAGAGTAATTGTCCATCCTTGTGGTTGTACCTTGTGACCACGACTGTGACTTGCATCACCTTGCCCGACCCCTACTCTAGATGATGAGACTTTACGTTCTAGAGCTGTAACGTCCTTCTCCACCGGCAAAAGCCATCTCTAAGTCAATCAATAACACTCTTTRACGACTACGCTGACC

1 5 10 15 20 25 30 35 40 45 50 55  
 V G T P T W N T G A D T E R S G T G W D E I Y Y S E M Q D L D I A G K K V A V F G L G D S V S Y C E N Y A D A T G

AGAGGTACGTGGATTGGTTCTTTTGGTTGGTGTGCTTTATGATCACAACCTAAGCATCTGTGACTTCAACAATAGTGCATGATGTTTTGAAAGCACTCGGGTGAAGATGATGGGTTACACCTCTGTGCGAMGGATATCTCCAGCAAGAACTAAAAGGCTCAGCGTGGAGAAAAGTTCTGTGGAAGTCCATTAGATGCGGTGAATCAAA  
 TCTCCATGCACCTAACCAAGAAACAAAACACACWGAAATACTAGTGTGGATTGCGTAGACACATGAAGTTGTTATCGACGCTACTACAAAACTCTGTTGAGCCACATTTACTACCCAAATGTGGAGACAGCTKCCTATAGAGGTGCTTCTTAGTTTCCGAGTGCACCTCTTTTCAAGACACCTGACGGTAATCTACGCCACTTAGTT

E  
 Exon2

1 5 10 15 20 25 30 35 40  
 L H D V F E A L G C K M M G Y T S V X G Y L H E E S K A Q R G E K F C G L P L D A V N Q

sgRNA2

GAGGAATTGACCGAGGAAAGAGTTCAAAAGTGGGTAGCTGCTCTCATCGCGGAAGGAATCTTGGAGGGTGGCGGTGAAAGTACTTCTACGGCAGCAGTGTCTGTGCCAATTGCTTCTCTGTTGCTGCAAGTTGCAACAACAGCCGTTGAAGTTGAGATCGTTTTCAGTTTTCAGAGCCAGCTTCAGGATATGTTGGGCACTACAACCTTAGA  
 CTCCTTAACTGGCTCCTTTCTCAAGTTTTACCCATCGACGAGAGTAGCGCCTTCTTAGAACCTCCACCGCCACTTCGATGAAGATGCCGTCGTACAGACACGGTAAACGAAGAGGACAACGACGTCACAGCTTGTGTCGGCACTTCAACTCTAGCAAAAGTCAAAGTCTCGGTCGAAGTCTATACAACCCGTGATGTTGGGATCT

45 50 55 60 65 70 75 80 85 90 95 100 105 110  
 E E L T E E R V Q K W V A A L I A E G I L E G G G E A T S T A A V S V P I A S P V A A V A T T A V E V E I V S V S E P A S G Y V G H Y N P R

Exon3

AGTGACAAAAAATGTGGATCAGTGTGACGGGCTTCATCATATGTTACCAAGTGGAGCTCCTTAGACAAGTCAAAATGATTGTACAGTTCGTTGAAAGAGATAGAGAATGAAAGTTATACATAAACTACATTCATATCAGTCGTGGATTCTCGGCTGGTTCTCCCATCACTACATCTTCTTCTGTTGCACACAGCA  
 TCACTGTTTGTGTACACCTAGTCACAACCTGCCCGCAAGTAGTATACAATGGTCACCTCGAGGAATCTGTTCAAGTTTACTAACATGTCAAGCACAACTTTCTATCTTACTTTTCAATATGATTGATGTAAGTATAGTCAGCACCTAAGGAGCCGACCAAGAGGGTAGTGATGTAGAAGGAAGACAACGTGTGCTCGT

115 120 125 130 135 140 145 150 155 160  
 S D K T M W I S V D G R S S Y V T S G A P T S Q M I V Q F V L K E I E N E K L Y I N Y I H I S

Exon3

3'  
 146  
 5'

|         | WT |    | Flav KO |    |   | - |
|---------|----|----|---------|----|---|---|
| Colony: | 5  | 16 | 9       | 14 | 1 |   |
| 750     | +  | +  | +       | +  | + |   |
| 500     |    |    | +       |    |   |   |

The diagram illustrates the human CYP11A1 gene structure and the binding sites for two sgRNAs. The gene structure shows Exon 1 (1-14 nt) and Exon 2 (15-61 nt) separated by a 47-nt intron. sgRNA1 targets the 5' end of Exon 1 (nt 1-14), and sgRNA2 targets the 5' end of Exon 2 (nt 15-61). The diagram shows the sgRNA sequences and their binding sites on the gene structure.

**sgRNA1** (top):  
 Sequence: 5'-ATTAAACAGGTAGGAACACCAACATGGAACACTGTTGCTGACACTGAAC-3'  
 Binding site: 1-14 nt of Exon 1

**sgRNA2** (bottom):  
 Sequence: 5'-GTAGTGGAACGGGCTGGGATGAGATCTACTACTCTGAAATGCAAGATCTCGACATTGCAAGGGAAGAGGTGGCCGTTTTTCGGATTAGGAGATTCAAGTTAGTTATTGTGAGAAATATGCTGATGCGACTGGAGAGGTACGTGGATTGGTTCTTTTGTTTTG-3'  
 Binding site: 15-61 nt of Exon 2

| Time (d) | Control (Fv/Fm) | Drought (Fv/Fm) |
|----------|-----------------|-----------------|
| 0        | 0.65            | 0.65            |
| 1        | 0.64            | 0.63            |
| 2        | 0.63            | 0.62            |
| 3        | 0.64            | 0.61            |
| 4        | 0.62            | 0.59            |
| 5        | 0.60            | 0.57            |
| 6        | 0.58            | 0.55            |
| 7        | 0.58            | 0.52            |

| Time (d) | Control (grey) | Drought (orange) | Drought + GA <sub>3</sub> (yellow) |
|----------|----------------|------------------|------------------------------------|
| 0        | 0.60           | 0.60             | 0.60                               |
| 2        | 0.58           | 0.60             | 0.60                               |
| 4        | 0.55           | 0.58             | 0.58                               |
| 6        | 0.45           | 0.42             | 0.45                               |
| 8        | 0.45           | 0.40             | 0.42                               |

| H <sub>2</sub> O <sub>2</sub> (μM) | Genotype | Median % Dead cells | Q1 % Dead cells | Q3 % Dead cells | Min % Dead cells | Max % Dead cells |
|------------------------------------|----------|---------------------|-----------------|-----------------|------------------|------------------|
| 0                                  | Δp1      | 0                   | 0               | 0               | 0                | 0                |
| 0                                  | Δp2      | 0                   | 0               | 0               | 0                | 0                |
| 25                                 | Δp1      | 0                   | 0               | 0               | 0                | 0                |
| 25                                 | Δp2      | 0                   | 0               | 0               | 0                | 0                |
| 50                                 | Δp1      | 0                   | 0               | 0               | 0                | 0                |
| 50                                 | Δp2      | 0                   | 0               | 0               | 0                | 0                |
| 75                                 | Δp1      | 15                  | 5               | 20              | 0                | 25               |
| 75                                 | Δp2      | 2                   | 0               | 5               | 0                | 10               |
| 100                                | Δp1      | 30                  | 25              | 50              | 20               | 60               |
| 100                                | Δp2      | 15                  | 10              | 20              | 10               | 25               |
| 150                                | Δp1      | 95                  | 85              | 100             | 70               | 100              |
| 150                                | Δp2      | 85                  | 80              | 95              | 75               | 100              |
| 200                                | Δp1      | 95                  | 90              | 100             | 90               | 100              |
| 200                                | Δp2      | 95                  | 90              | 100             | 90               | 100              |
| 250                                | Δp1      | 95                  | 90              | 100             | 90               | 100              |
| 250                                | Δp2      | 95                  | 90              | 100             | 90               | 100              |

Box plot showing the percentage of dead cells in response to  $H_2O_2$  treatment for Flav-KO and WT strains across different colonies. The y-axis represents % Dead cells (0 to 100), and the x-axis represents  $H_2O_2$  ( $\mu M$ ) (100 to 200). The legend indicates Colony (1, 14, 9, 0, 16, 5) and Strain (Flav-KO, WT). Asterisks (\*) indicate significant differences between Flav-KO and WT strains at each  $H_2O_2$  concentration.

| $H_2O_2$ ( $\mu M$ ) | Strain  | Colony | % Dead cells (approx. median) |
|----------------------|---------|--------|-------------------------------|
| 100                  | Flav-KO | 1      | 18                            |
| 100                  | Flav-KO | 14     | 20                            |
| 100                  | Flav-KO | 9      | 15                            |
| 100                  | WT      | 0      | 10                            |
| 100                  | WT      | 16     | 12                            |
| 100                  | WT      | 5      | 10                            |
| 100                  | Flav-KO | 1      | 85                            |
| 100                  | Flav-KO | 14     | 88                            |
| 100                  | Flav-KO | 9      | 90                            |
| 100                  | WT      | 0      | 75                            |
| 100                  | WT      | 16     | 72                            |
| 100                  | WT      | 5      | 70                            |
| 200                  | Flav-KO | 1      | 85                            |
| 200                  | Flav-KO | 14     | 88                            |
| 200                  | Flav-KO | 9      | 90                            |
| 200                  | WT      | 0      | 70                            |
| 200                  | WT      | 16     | 68                            |
| 200                  | WT      | 5      | 65                            |
