# Supplementary material for: Divergent functions of two clades of flavodoxin in diatoms mitigate oxidative stress and iron limitation
Source: eLife journal article supplement (doi:10.7554/elife.84392), 2023-06-06

- ☆ Known induced under Fe limitation
- ★ Known **not** induced under Fe limitation

Text labels:  
Diatoms  
Not diatoms

Diatoms classes:

- ▶ Raphid pennate
- ▷ Araphid pennate
- Polar centric
- Radial centric

Taxonomy colored strip:

- Diatoms
- Other stramenopiles
- Dinoflagellates
- Other alveolates
- Cryptophyceae
- Haptophytes
- Green alga
- Choanoflagellates

Colored branches:  
Clade I  
Clade II

Pies represent environmental transcripts:  
Diel 2015  
Gradients 2016  
Gradients 2017  
Size proportional to number of

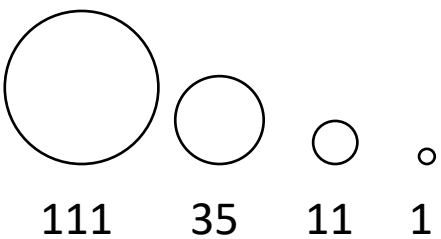

Supplement: supp [file elife-84392-supp-v1.zip]
