# Supplementary figures and images for: Divergent functions of two clades of flavodoxin in diatoms mitigate oxidative stress and iron limitation
Source: eLife journal article supplement (doi:10.7554/elife.84392), 2023-06-06

**A**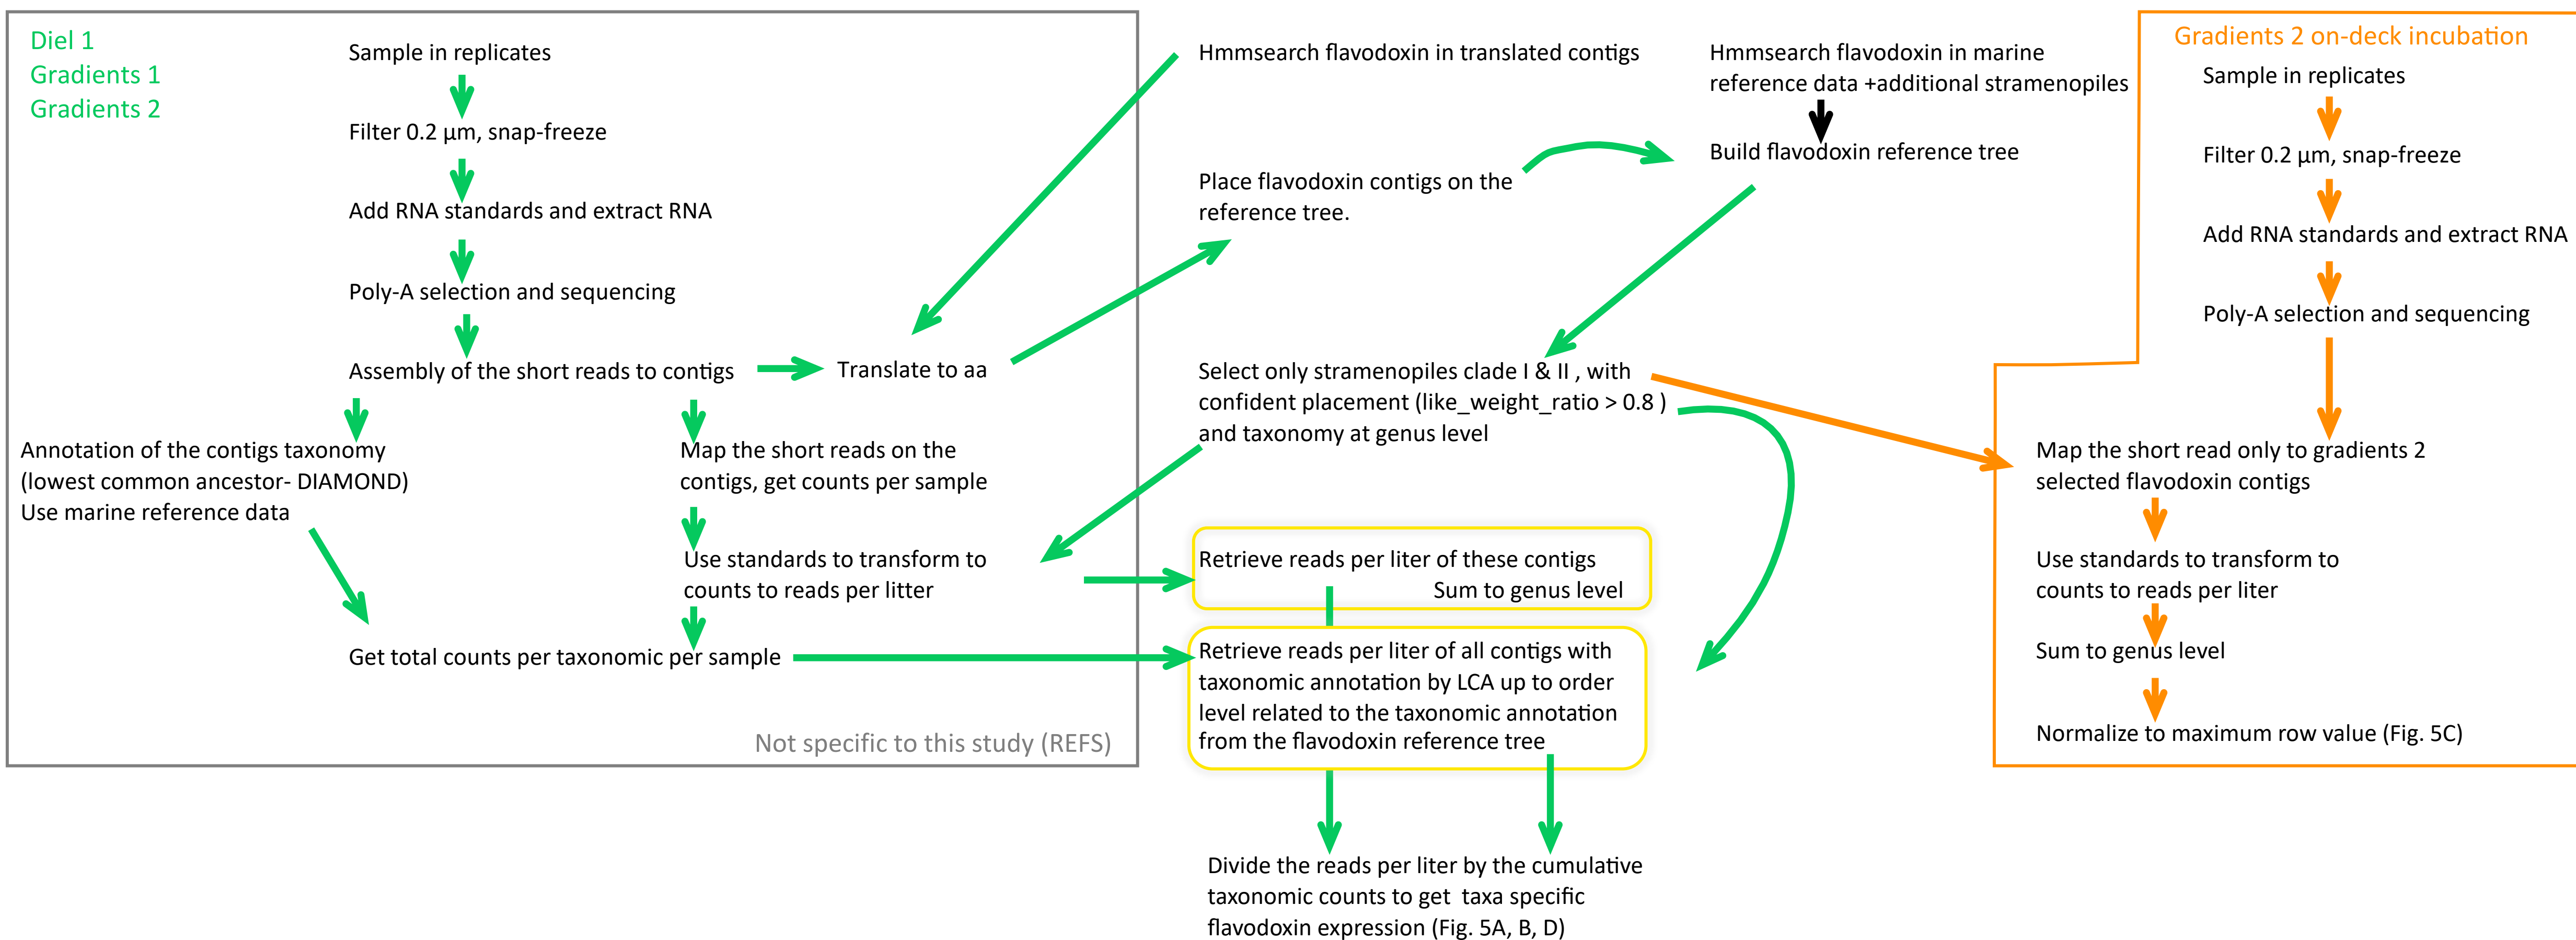**B**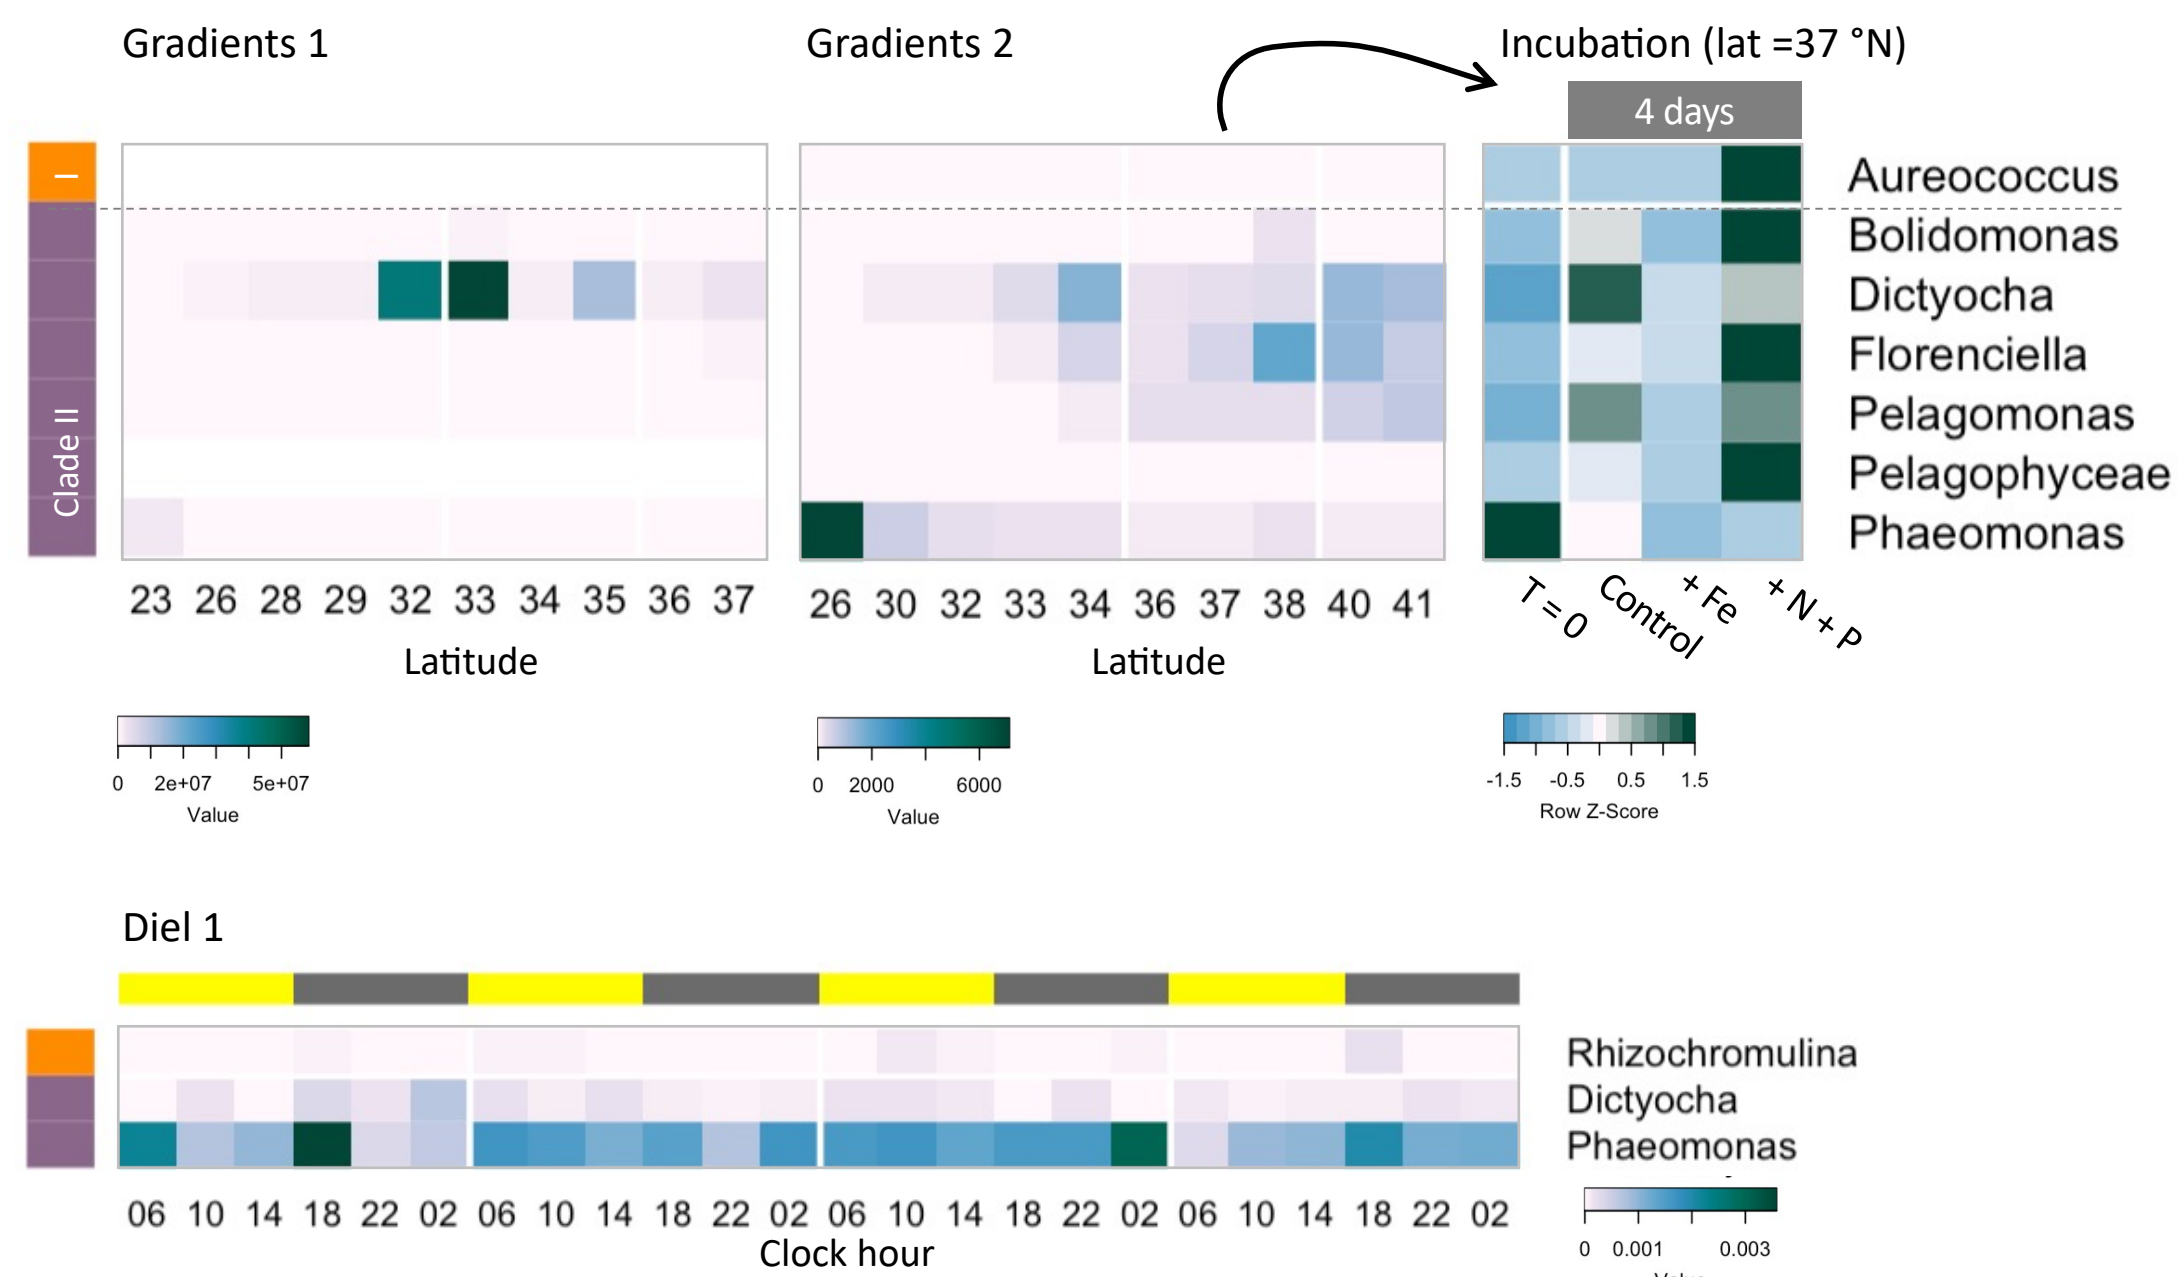**C**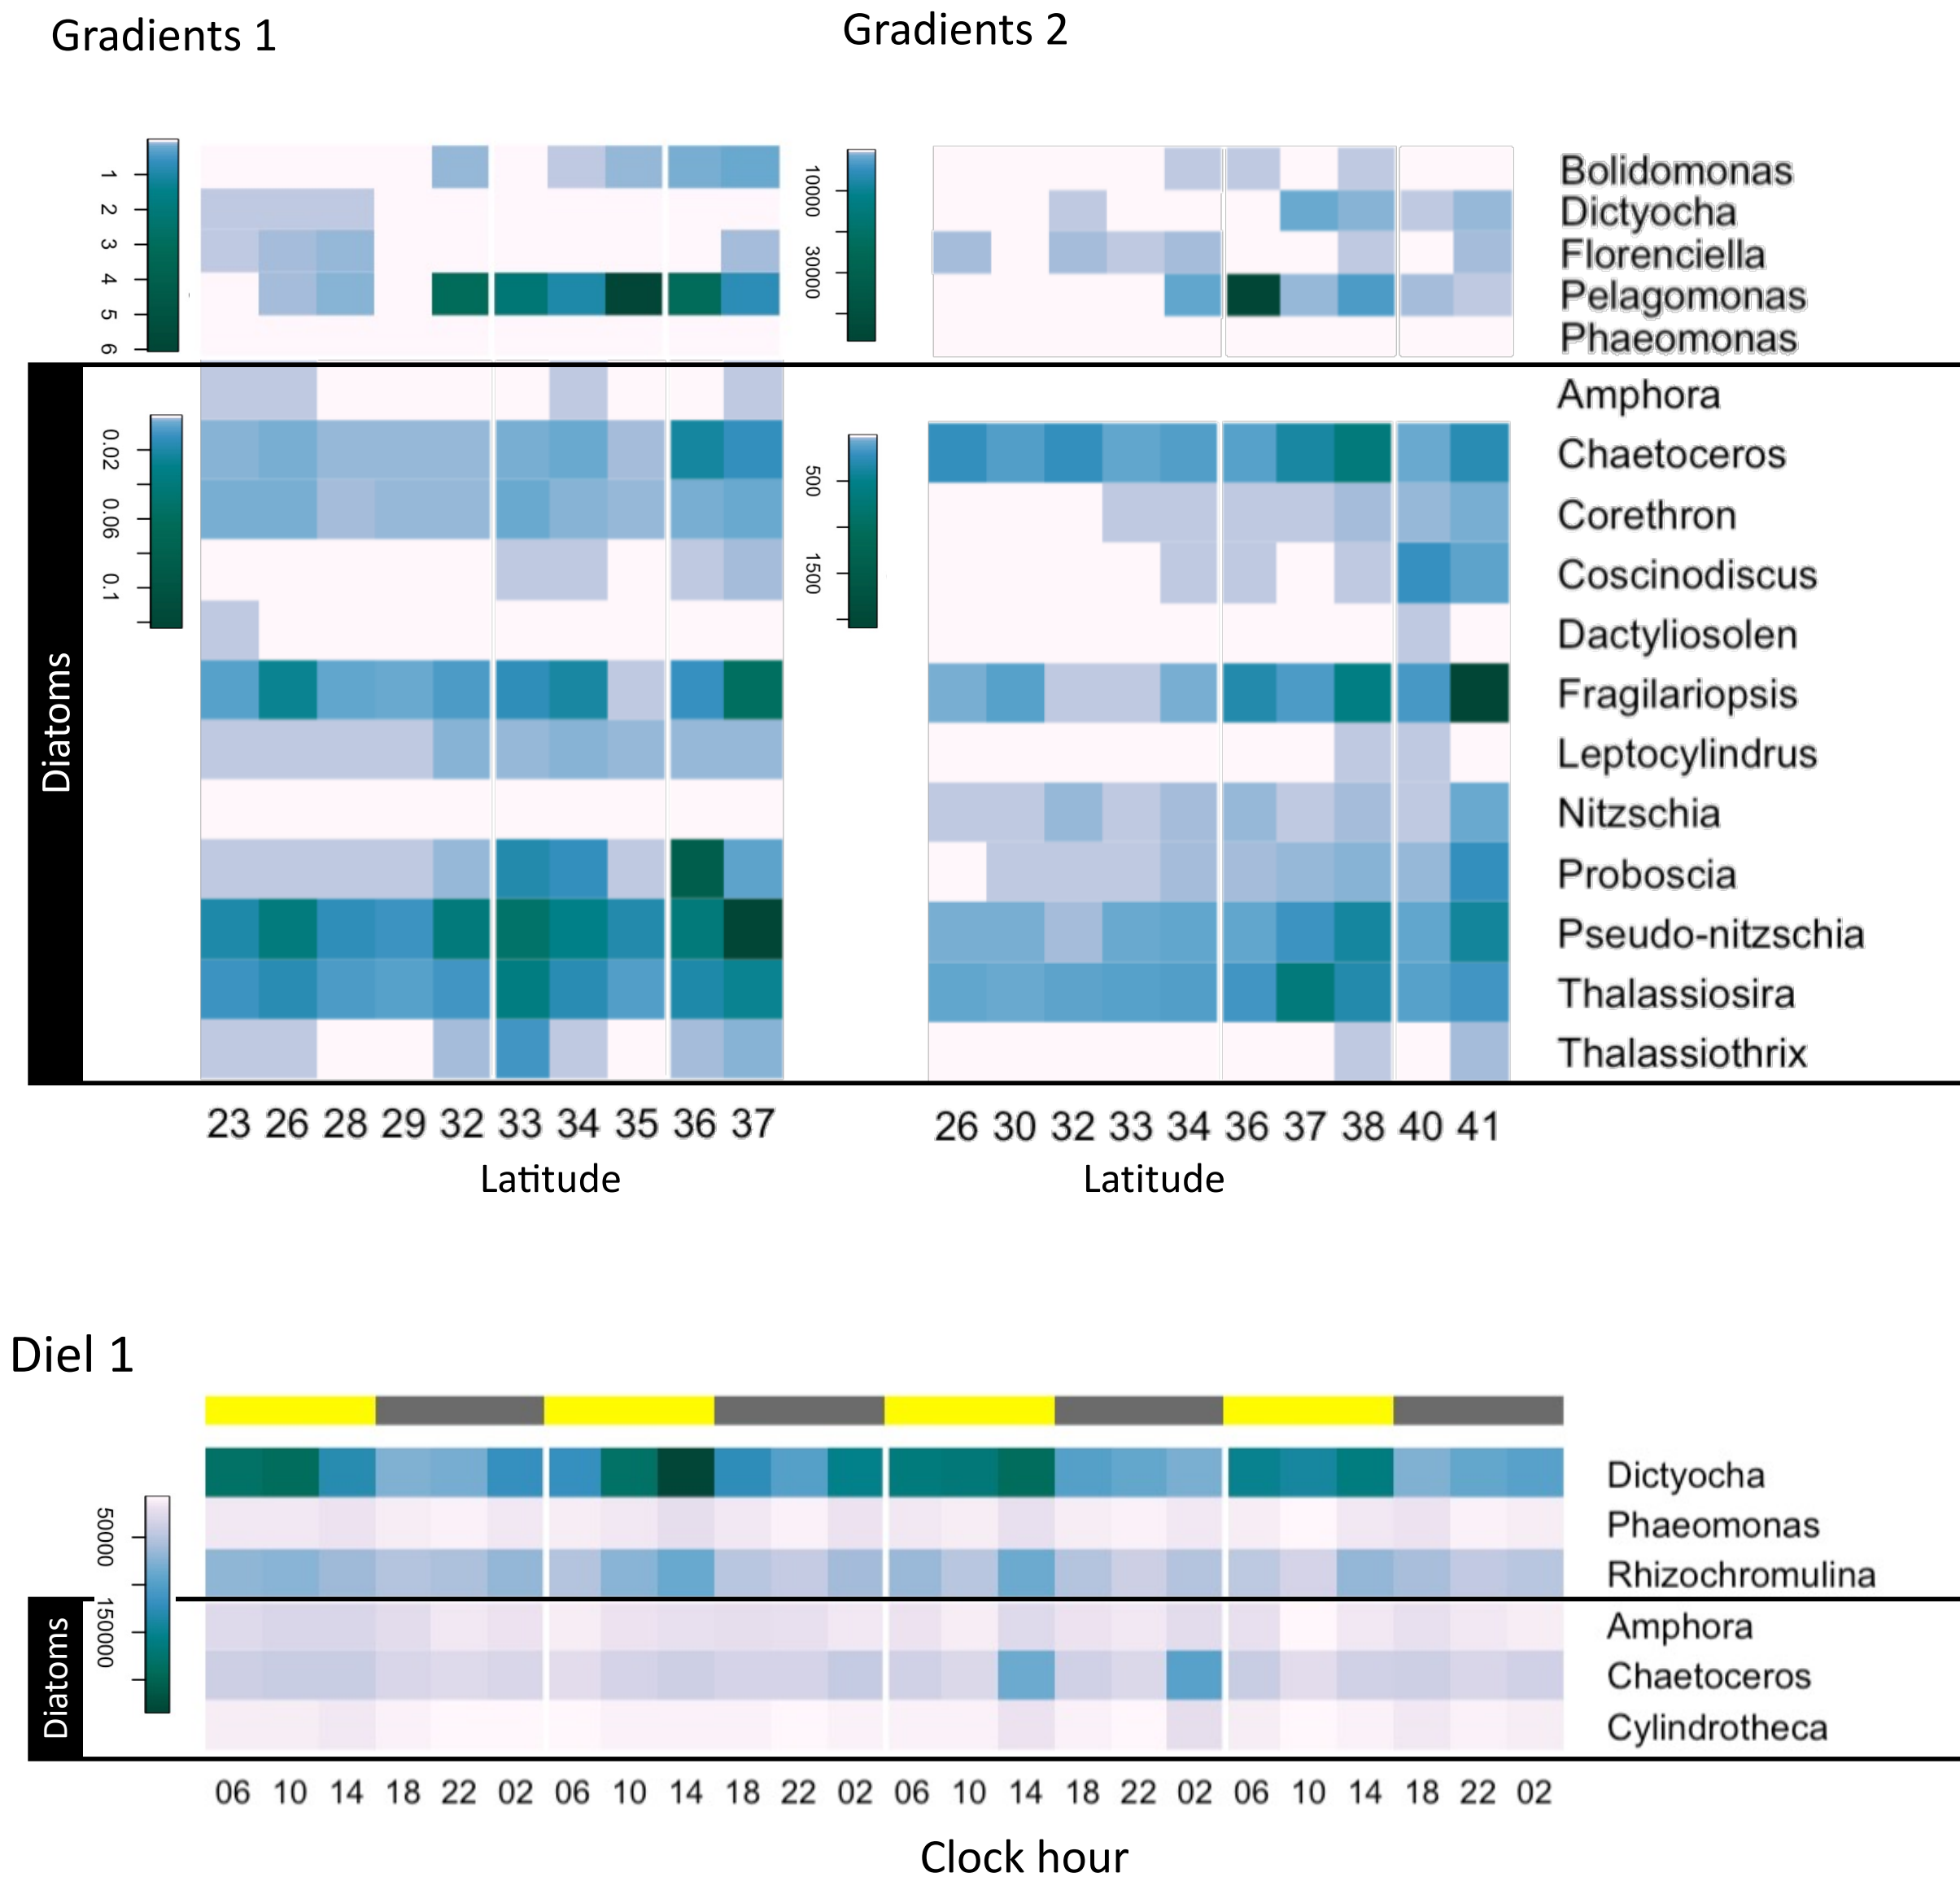

Supplement: supp [file elife-84392-supp-v1.zip]
